# Supplementary material for: Integrated GWAS and Gene Expression Suggest ORM1 as a Potential Regulator of Plasma Levels of Cell-Free DNA and Thrombosis Risk
Source: PubMed Central journal article supplement — Thromb Haemost. 2022 Mar 10;122(6):1027–39. doi: 10.1055/s-0041-1742169 (PMC9251712; doi:10.1055/s-0041-1742169), 2022-03-10
Supplement: 10-1055-s-0041-1742169-s210152.pdf [file 10-1055-s-0041-1742169-s210152.pdf]

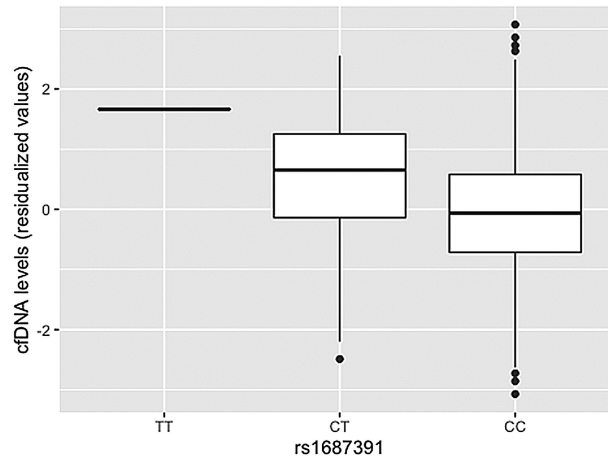

**Supplementary Fig. S1** Plasma levels of cfDNA versus rs1687391 in GAIT-2. Box plot showing the association of plasma levels of cfDNA (plate-normalized cfDNA values are represented on the y-axis) with the genotype of the lead SNP rs1687391 (x-axis) identified in the GWAS for cfDNA levels in GAIT-2. The effect of the minor rs1687391-T allele on increasing the plasma levels of cfDNA is shown. cfDNA, cell-free DNA; SNP, single nucleotide polymorphism.

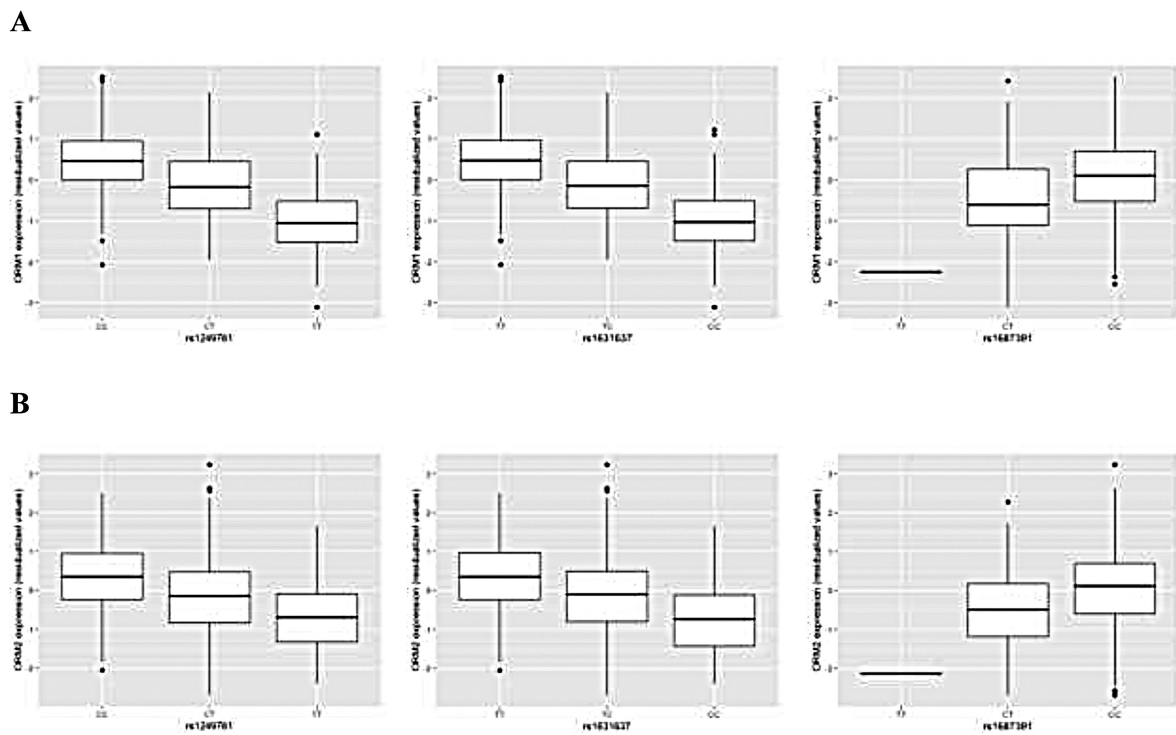

**Supplementary Fig. S2** Box plots of *ORM1* and *ORM2* expression levels versus genotypes of most relevant *cis*-eQTL variants identified in whole blood. Box plots illustrating *ORM1* (A) and *ORM2* (B) residual expression levels (y-axis) as a function of the genotypes of their strongest *cis*-eQTLs (x-axis). From left to right, rs1249761, the lead *cis*-eQTL of *ORM1* (rs1249761-C;  $\beta = 0.73$ ;  $p = 8.17 \times 10^{-65}$ ) is also an eQTL of *ORM2* (rs1249761-C;  $\beta = 0.53$ ;  $p = 1.18 \times 10^{-28}$ ); rs1631637, the lead *cis*-eQTL of *ORM2* (rs1631637-T;  $\beta = 0.53$ ;  $p = 4.36 \times 10^{-31}$ ) is also an eQTL of *ORM1* (rs1631637-T;  $\beta = 0.69$ ;  $p = 2.42 \times 10^{-63}$ ); rs1687391, the lead SNP in our GWAS for cfDNA levels is a *cis*-eQTL for *ORM1* (rs1687391-T;  $\beta = -0.673$ ;  $p = 6.14 \times 10^{-9}$ ) and for *ORM2* (rs1687391-T;  $\beta = -0.691$ ;  $p = 2.07 \times 10^{-8}$ ). cfDNA, cell-free DNA; eQTL, expression quantitative trait loci; SNP, single nucleotide polymorphism.

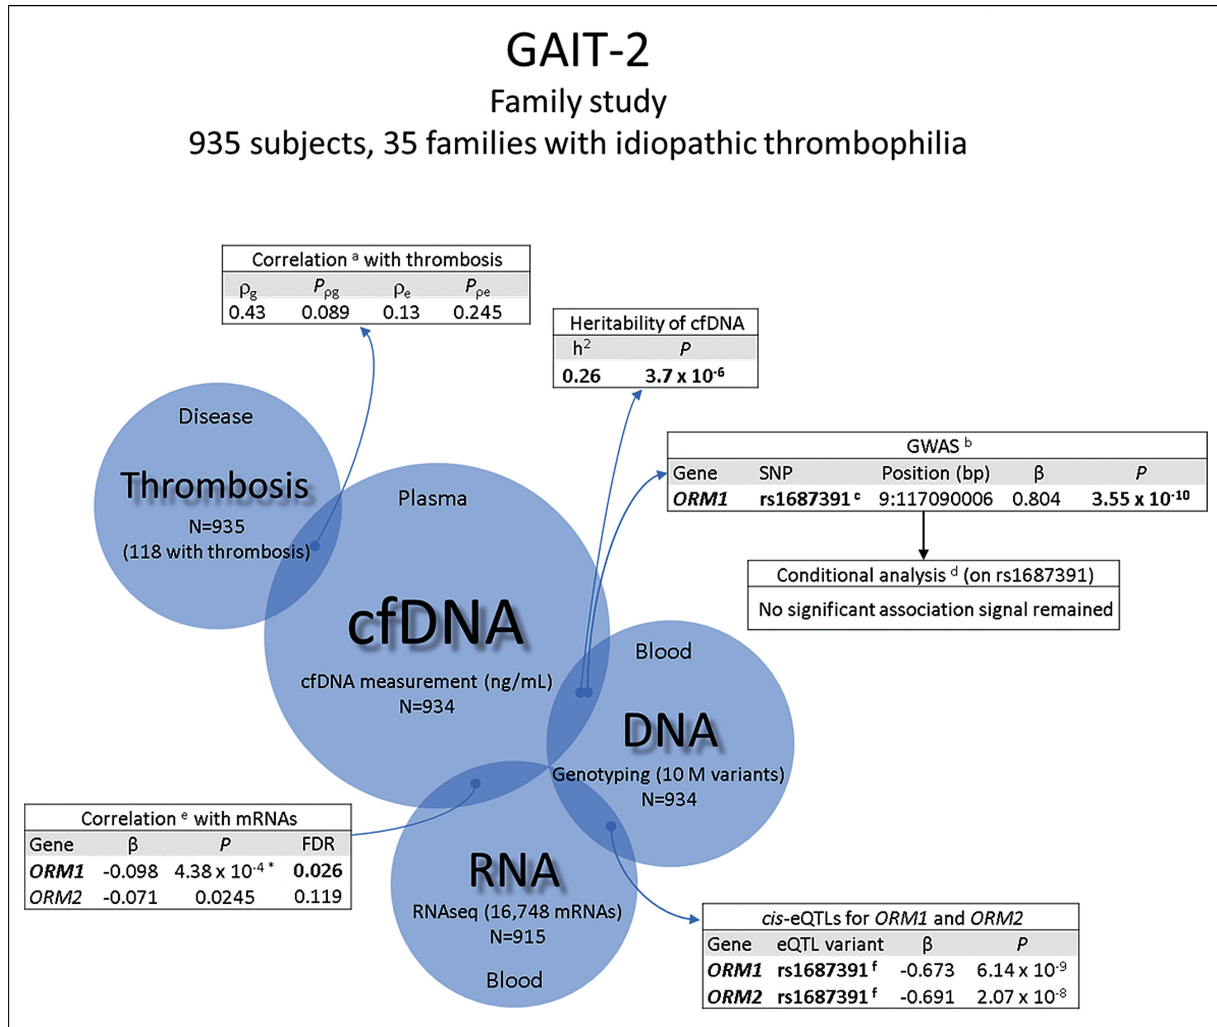

**Supplementary Fig. S3** Design and results of the study of cfDNA in GAIT-2. Design of an integrated genetic and transcriptomic analysis with 935 subjects from a family study of idiopathic thrombophilia (GAIT-2). cfDNA levels were measured in plasma as a marker of NETs, with the aim to identify genes that control the interindividual variability of cfDNA. Our results show evidence of the role of *ORM1* in regulating cfDNA levels in plasma, which might contribute to the susceptibility to thrombosis. cfDNA, cell-free DNA; NET, neutrophil extracellular trap. <sup>a</sup>Genetic and environmental correlations of cfDNA with thrombosis (including venous thrombosis, arterial thrombosis and both) in the GAIT-2 sample. A  $P \leq 0.05$  was considered as significant.  $\rho_g$ : coefficient of genetic correlation between cfDNA and thrombosis;  $P_{\rho_g}$ :  $P$  value of the genetic correlation coefficient;  $\rho_e$ : coefficient of environmental correlation between cfDNA and thrombosis;  $P_{\rho_e}$ :  $P$  value of the environmental correlation coefficient;  $P$  value  $\leq 0.05$  was considered as statistically significant.  $h^2$ : Heritability. <sup>b</sup>Genome-wide association study for cfDNA levels. A genome-wide  $P \leq 5 \times 10^{-8}$  was considered statistically significant. <sup>c</sup>Lead SNP in the GWAS.  $\beta$ : Effect size of one copy of the minor allele. <sup>d</sup>Conditional analysis on the lead SNP rs1687391. <sup>e</sup>Linear associations of cfDNA levels with gene expression levels. \*Significant  $P$  values at a FDR  $< 0.05$ . <sup>f</sup>The lead SNP rs1687391 is a significant cis-eQTL for both *ORM1* and *ORM2* after Bonferroni correction, considering significance at  $P < 0.05/28,133$ .

**Supplementary Table S1** Genetic and environmental correlations of cfDNA levels with thrombosis in GAIT-2

| Disease    | $\rho_g$ | $P_{\rho_g}$ | $\rho_e$ | $P_{\rho_e}$ | $n$ (%) <sup>a</sup> |
|------------|----------|--------------|----------|--------------|----------------------|
| Thrombosis | 0.43     | 0.089        | 0.13     | 0.246        | 118 (12.62)          |
| • VT       | 0.41     | 0.135        | 0.15     | 0.142        | 85 (9.09)            |
| • AT       | 0.58     | 0.186        | -0.09    | 0.571        | 47 (5.02)            |

Note:  $\rho_g$ : genetic correlation coefficient;  $P_{\rho_g}$ :  $p$ -value of the genetic correlation coefficient;  $\rho_e$ : environmental correlation coefficient;  $P_{\rho_e}$ :  $p$ -value of the environmental correlation coefficient;  $p \leq 0.05$  was considered statistically significant. Thrombosis included 71 patients with VT (venous thrombosis), 33 patients with AT (arterial thrombosis), and 14 patients with both VT and AT.

<sup>a</sup>Total number of individuals in GAIT-2 affected with the disease. The percentage of individuals of the total sample ( $n = 935$ ) is shown in brackets.

**Supplementary Table S7** cis-eQTL variants overlapping with SNPs of the associated locus with cfDNA levels on chromosome 9

| eQTL variant             | Position (bp) <sup>a</sup> | eQTL Location | eQTL type  | Alleles <sup>b</sup> | Minor Allele | MAF <sup>c</sup> | GWAS data              |           |                  | cis-eQTL data for ORM1 |           |                        | cis-eQTL data for ORM2 |           |                        |
|--------------------------|----------------------------|---------------|------------|----------------------|--------------|------------------|------------------------|-----------|------------------|------------------------|-----------|------------------------|------------------------|-----------|------------------------|
|                          |                            |               |            |                      |              |                  | $p^d$                  | $\beta^e$ | Var <sup>f</sup> | Distance from TSS (bp) | $\beta^e$ | $p^g$                  | Distance from TSS (bp) | $\beta^e$ | $p^g$                  |
| rs1687391 <sup>h</sup>   | 117090006                  | ORM1          | Intergenic | C/T                  | T            | 0.057            | $3.54 \times 10^{-10}$ | 0.804     | 0.0495           | 4,670                  | -0.673    | $6.14 \times 10^{-9}$  | -2,143                 | -0.691    | $2.07 \times 10^{-8}$  |
| rs10982163 <sup>h</sup>  | 117091033                  | ORM2          | Intergenic | G/T/A                | T            | 0.059            | $9.77 \times 10^{-10}$ | 0.764     | 0.0473           | 5,697                  | -0.658    | $5.32 \times 10^{-9}$  | -1,116                 | -0.697    | $6.14 \times 10^{-9}$  |
| rs10982164 <sup>h</sup>  | 117091067                  | ORM2          | Intergenic | G/A                  | A            | 0.058            | $9.8 \times 10^{-10}$  | 0.764     | 0.0472           | 5,731                  | -0.658    | $5.26 \times 10^{-9}$  | -1,082                 | -0.697    | $6.0 \times 10^{-9}$   |
| rs112164771 <sup>h</sup> | 117091002                  | ORM2          | Intergenic | C/T/A                | T            | 0.059            | $1.25 \times 10^{-9}$  | 0.759     | 0.0469           | 5,666                  | -0.661    | $4.3 \times 10^{-9}$   | -1,147                 | -0.690    | $8.16 \times 10^{-9}$  |
| rs1687390                | 117089888                  | ORM1          | Intergenic | G/A                  | A            | 0.063            | $3.59 \times 10^{-9}$  | 0.711     | 0.0442           | 4,552                  | -0.649    | $1.76 \times 10^{-9}$  | -2,261                 | -0.712    | $5.29 \times 10^{-10}$ |
| rs7040440 <sup>i</sup>   | 117091074                  | ORM2          | Intergenic | C/T/G                | T            | 0.068            | $3.97 \times 10^{-9}$  | 0.679     | 0.0427           | 5,738                  | -0.538    | $2.17 \times 10^{-7}$  | -1,075                 | -0.560    | $4.04 \times 10^{-7}$  |
| rs146077223 <sup>h</sup> | 117089921                  | ORM1          | Intergenic | G/T                  | T            | 0.063            | $7.98 \times 10^{-9}$  | 0.697     | 0.0425           | 4,585                  | -0.643    | $2.70 \times 10^{-9}$  | -2,228                 | -0.706    | $7.77 \times 10^{-10}$ |
| rs3762056 <sup>h</sup>   | 117090434                  | ORM2          | Intergenic | C/T                  | T            | 0.063            | $8.10 \times 10^{-9}$  | 0.696     | 0.0425           | 5,098                  | -0.640    | $2.99 \times 10^{-9}$  | -1,715                 | -0.707    | $7.2 \times 10^{-10}$  |
| rs10982154 <sup>h</sup>  | 117087212                  | ORM1          | Intron     | T/A                  | A            | 0.063            | $9.67 \times 10^{-9}$  | 0.693     | 0.0419           | 1,876                  | -0.647    | $2.05 \times 10^{-9}$  | -4,937                 | -0.704    | $8.79 \times 10^{-10}$ |
| rs10982155 <sup>h</sup>  | 117087254                  | ORM1          | Intron     | C/T                  | T            | 0.063            | $9.68 \times 10^{-9}$  | 0.693     | 0.0419           | 1,918                  | -0.647    | $2.07 \times 10^{-9}$  | -4,895                 | -0.704    | $8.79 \times 10^{-10}$ |
| rs145835687              | 117087745                  | ORM1          | Intron     | G/A/T                | A            | 0.063            | $9.84 \times 10^{-9}$  | 0.692     | 0.0419           | 2,409                  | -0.645    | $2.25 \times 10^{-9}$  | -4,404                 | -0.703    | $9.0 \times 10^{-10}$  |
| rs10982156 <sup>h</sup>  | 117088064                  | ORM1          | Intron     | T/A                  | A            | 0.063            | $1.0 \times 10^{-8}$   | 0.691     | 0.0418           | 2,728                  | -0.643    | $2.38 \times 10^{-9}$  | -4,085                 | -0.702    | $9.25 \times 10^{-10}$ |
| rs3762055 <sup>i</sup>   | 117090575                  | ORM2          | Intergenic | T/C                  | C            | 0.063            | $1.09 \times 10^{-8}$  | 0.686     | 0.0416           | 5,239                  | -0.633    | $3.72 \times 10^{-9}$  | -1,574                 | -0.695    | $1.12 \times 10^{-9}$  |
| rs116994374 <sup>i</sup> | 117084672                  | ORM1          | Intergenic | G/A                  | A            | 0.062            | $1.73 \times 10^{-8}$  | 0.693     | 0.0395           | -664                   | -0.688    | $3.58 \times 10^{-10}$ | -7,477                 | -0.793    | $1.03 \times 10^{-11}$ |
| rs113354603 <sup>i</sup> | 117086241                  | ORM1          | Intron     | G/A                  | A            | 0.066            | $1.76 \times 10^{-8}$  | 0.665     | 0.0391           | 905                    | -0.561    | $1.16 \times 10^{-7}$  | -5,908                 | -0.632    | $1.99 \times 10^{-8}$  |
| rs188924106              | 117084722                  | ORM1          | Intergenic | G/A                  | A            | 0.062            | $2.06 \times 10^{-8}$  | 0.689     | 0.0392           | -614                   | -0.684    | $4.6 \times 10^{-10}$  | -7,427                 | -0.795    | $8.53 \times 10^{-12}$ |
| rs150611042 <sup>h</sup> | 117083803                  | ORM1          | Intergenic | C/A/T                | A            | 0.063            | $3.07 \times 10^{-8}$  | 0.679     | 0.0379           | -1,533                 | -0.675    | $7.25 \times 10^{-10}$ | -8,346                 | -0.779    | $2.20 \times 10^{-11}$ |
| rs140041983 <sup>h</sup> | 117084971                  | ORM1          | Intergenic | C/G/T                | G            | 0.054            | $1.15 \times 10^{-7}$  | 0.700     | 0.0357           | -365                   | -0.713    | $1.35 \times 10^{-9}$  | -7,178                 | -0.830    | $3.05 \times 10^{-11}$ |
| rs7851482 <sup>h</sup>   | 117078286                  | COL27A1       | Intergenic | T/G                  | G            | 0.398            | $1.64 \times 10^{-6}$  | -0.260    | 0.0232           | -7,050                 | 0.623     | $1.26 \times 10^{-43}$ | -13,863                | 0.504     | $7.24 \times 10^{-25}$ |
| rs11787950 <sup>h</sup>  | 117072382                  | COL27A1       | Intron     | G/A                  | A            | 0.471            | $1.80 \times 10^{-6}$  | -0.248    | 0.0249           | -12,954                | 0.571     | $7.88 \times 10^{-39}$ | -19,767                | 0.491     | $3.22 \times 10^{-25}$ |
| rs1249756 <sup>h</sup>   | 117073006                  | COL27A1       | 3'UTR      | C/T                  | T            | 0.372            | $4.17 \times 10^{-6}$  | -0.234    | 0.0241           | -12,330                | 0.677     | $2.98 \times 10^{-59}$ | -19,143                | 0.521     | $8.75 \times 10^{-30}$ |
| rs9299216 <sup>h</sup>   | 117078173                  | COL27A1       | Intergenic | A/T                  | T            | 0.351            | $4.22 \times 10^{-6}$  | -0.244    | 0.0236           | -7,163                 | 0.727     | $2.49 \times 10^{-62}$ | -13,976                | 0.556     | $9.9 \times 10^{-31}$  |
| rs1631637 <sup>h</sup>   | 117076684                  | COL27A1       | Intergenic | T/C                  | C            | 0.349            | $4.97 \times 10^{-6}$  | -0.229    | 0.0236           | -8,652                 | 0.692     | $2.42 \times 10^{-63}$ | -15,465                | 0.528     | $4.36 \times 10^{-31}$ |
| rs1766082 <sup>h</sup>   | 117077326                  | COL27A1       | Intergenic | G/T                  | T            | 0.347            | $5.30 \times 10^{-6}$  | -0.231    | 0.0233           | -8,010                 | 0.701     | $9.65 \times 10^{-64}$ | -14,823                | 0.529     | $1.34 \times 10^{-30}$ |
| rs1249760 <sup>h</sup>   | 117070767                  | COL27A1       | Intron     | C/A/T                | A            | 0.341            | $6.6 \times 10^{-6}$   | -0.236    | 0.0223           | -14,569                | 0.724     | $3.98 \times 10^{-64}$ | -21,382                | 0.541     | $4.0 \times 10^{-30}$  |
| rs1249761 <sup>h</sup>   | 117069223                  | COL27A1       | Intron     | C/T                  | T            | 0.338            | $7.98 \times 10^{-6}$  | -0.234    | 0.0226           | -16,113                | 0.730     | $8.17 \times 10^{-65}$ | -22,926                | 0.530     | $1.18 \times 10^{-28}$ |
| rs2787334 <sup>h</sup>   | 117078838                  | COL27A1       | Intergenic | C/T/G                | T            | 0.395            | $2.60 \times 10^{-5}$  | -0.228    | 0.0170           | -6,498                 | 0.641     | $4.08 \times 10^{-45}$ | -13,311                | 0.492     | $3.72 \times 10^{-23}$ |
| rs1000744 <sup>h</sup>   | 117072656                  | COL27A1       | Intron     | C/A                  | A            | 0.454            | $5.30 \times 10^{-5}$  | -0.223    | 0.0200           | -12,680                | 0.657     | $8.88 \times 10^{-45}$ | -19,493                | 0.420     | $3.65 \times 10^{-16}$ |
| rs111548718 <sup>i</sup> | 117067888                  | COL27A1       | Intron     | G/C/A                | C            | 0.113            | $5.60 \times 10^{-5}$  | 0.349     | 0.0223           | -17,448                | -0.742    | $1.26 \times 10^{-22}$ | -24,261                | -0.602    | $1.59 \times 10^{-13}$ |

Supplementary Table S7 (Continued)

| eQTL variant            | Position (bp) <sup>a</sup> | eQTL Location | eQTL type  | Alleles <sup>b</sup> | Minor Allele | MAF <sup>c</sup> | GWAS data               |                |                  | cis-eQTL data for ORM1 |                |                          | cis-eQTL data for ORM2 |                |                          |
|-------------------------|----------------------------|---------------|------------|----------------------|--------------|------------------|-------------------------|----------------|------------------|------------------------|----------------|--------------------------|------------------------|----------------|--------------------------|
|                         |                            |               |            |                      |              |                  | p <sup>d</sup>          | β <sup>e</sup> | Var <sup>f</sup> | Distance from TSS (bp) | β <sup>e</sup> | p <sup>g</sup>           | Distance from TSS (bp) | β <sup>e</sup> | p <sup>g</sup>           |
| rs1249751 <sup>h</sup>  | 117065812                  | COL27A1       | Intron     | G/C                  | C            | 0.38             | 6.10 × 10 <sup>-5</sup> | -0.211         | 0.0188           | -19,524                | 0.628          | 3.06 × 10 <sup>-45</sup> | -26,337                | 0.466          | 1.1 × 10 <sup>-21</sup>  |
| rs2636881 <sup>h</sup>  | 117080388                  | ORM1          | Intergenic | A/G                  | G            | 0.245            | 7.60 × 10 <sup>-5</sup> | 0.241          | 0.0176           | -4,948                 | -0.552         | 2.90 × 10 <sup>-25</sup> | -11,761                | -0.526         | 2.23 × 10 <sup>-20</sup> |
| rs2993412 <sup>h</sup>  | 117091499                  | ORM2          | Intergenic | A/C                  | C            | 0.26             | 2.84 × 10 <sup>-4</sup> | 0.208          | 0.0145           | 6,163                  | -0.431         | 4.15 × 10 <sup>-17</sup> | -650                   | -0.416         | 2.68 × 10 <sup>-14</sup> |
| rs1249753 <sup>h</sup>  | 117064559                  | COL27A1       | Intron     | C/A/T/G              | A            | 0.415            | 4.45 × 10 <sup>-4</sup> | 0.178          | 0.0145           | -20,777                | 0.541          | 9.64 × 10 <sup>-36</sup> | -27,590                | 0.392          | 9.5 × 10 <sup>-17</sup>  |
| rs10982136 <sup>i</sup> | 117058723                  | COL27A1       | Intron     | A/G                  | G            | 0.145            | 1.28 × 10 <sup>-3</sup> | 0.249          | 0.0146           | -26,613                | -0.561         | 6.08 × 10 <sup>-16</sup> | -33,426                | -0.459         | 6.52 × 10 <sup>-10</sup> |

Abbreviations: COL27A1, collagen type XXVII α 1; eQTL, expression quantitative trait loci; eQTL location, indicates the closest gene to the eQTL variant; ORM1, orosomucoid 1; ORM2, orosomucoid 2; TSS, transcription start site.

Note: eQTL variants without footnote indicate they were not found in GTEx either directly or through a proxy.

<sup>a</sup>Position (bp) was based on the human GRCh37/hg19 assembly.

<sup>b</sup>Alleles aligned to + strand. Underlined alleles are very rare alleles in some populations, with minor allele frequency (MAF) < 0.01, not present in our sample.

<sup>c</sup>Minor allele frequency of the SNP.

<sup>d</sup>p-Value of the association with cfDNA levels. Genome-wide significant threshold was set at  $p \leq 5 \times 10^{-8}$ .

<sup>e</sup>Effect size of a single risk allele.

<sup>f</sup>Percentage of the variance in cfDNA levels that is explained by the effect of one copy of the rare allele.

<sup>g</sup>Nominal p-values of cis-eQTL variants. Significance was considered after Bonferroni correction at  $p < 0.05/28,133$ .

<sup>h</sup>Indicates the eQTL variants that were found also in GTEx as significant cis-eQTLs for both ORM1 and ORM2.

<sup>i</sup>Indicates the eQTL variants that were found also in GTEx as significant cis-eQTLs for ORM2 only.
